# Supplementary material
Source: PubMed Central journal article supplement (PMC4719428)
Supplement: MCB.00656-15_zmb999101109so1.pdf [file MCB.00656-15_zmb999101109so1.pdf]

## **SUPPLEMENTAL MATERIAL**

### **Movies M1, M2: Representative recording of live-confocal imaging of Ostm1-EGFP dispersion in control and KIF5B siRNA transfected COS-7 cells.**

Movie M1) Time lapse movie of Ostm1-EGFP (green) intracellular dynamic dispersion in control COS-7 cells that colocalize with a majority of endosomal/lysosomal organelles (LysoTracker, red).

Movie M2) Time lapse movie of Ostm1-EGFP (green) intracellular dynamic dispersion in COS-7 cells transfected with KIF5B siRNA expression (+siRNA). The depletion of KIF5B expression affects Ostm1-EGFP (green) and endosome/lysosome (Lysotracker, red) dynamic dispersion and resulted in co-clustering around the nucleus (yellow). These results are representative of five independent clones recording for each setting.
